# Supplementary material
Source: publisher figshare collection journal article supplement (https://acs.figshare.com/ndownloader/files/3606129)

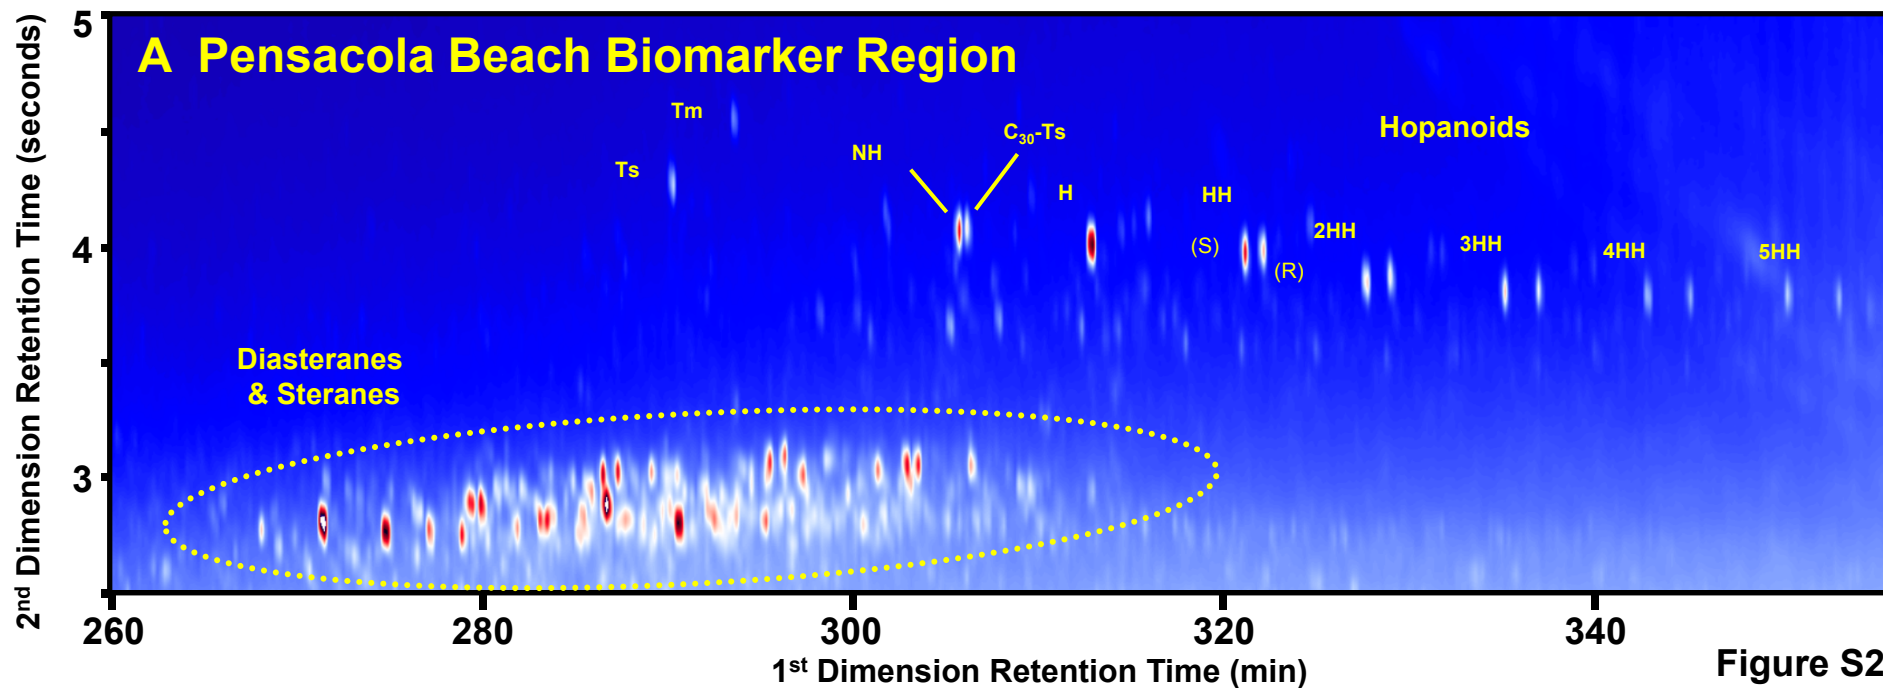

Figure S2

**B Macondo Well Oil**

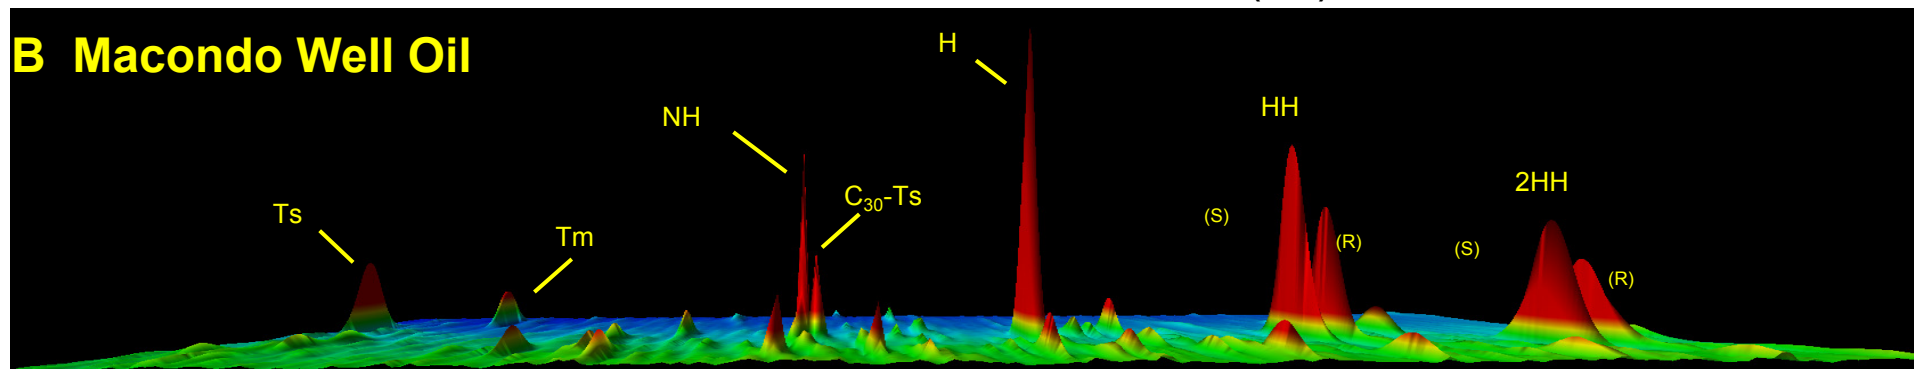

**C Pensacola Beach**

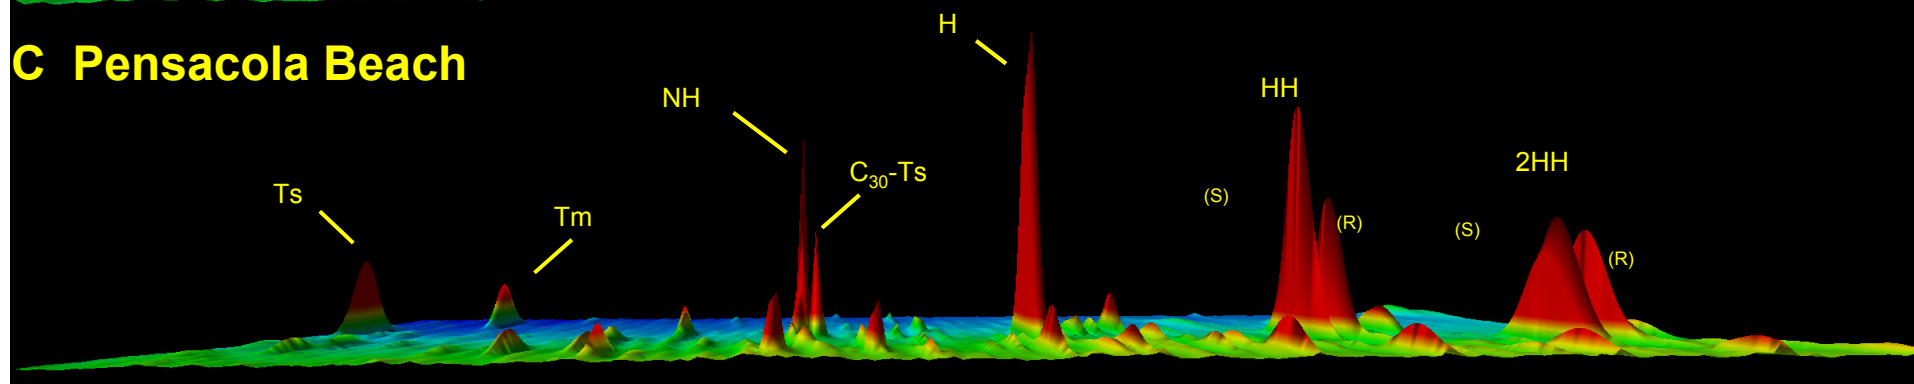

Supplement: Supplementary file 1 [file 3606129]
